# Supplementary material for: Clinical Outcomes after International Referral of Uveal Melanoma Patients for Proton Therapy
Source: MDPI journal article supplement (doi:10.3390/cancers13246241), 2021-12-13
Supplement: s1 [file s1]

Supplementary Figure S1. Oncological outcomes in all patients

All patients  
Local recurrence-free survival

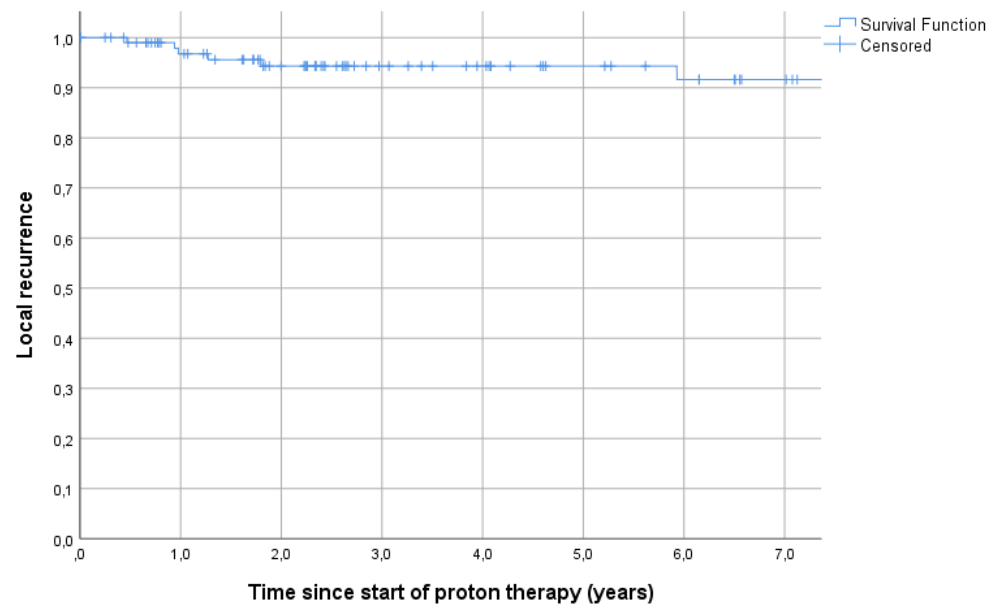

Numbers at risk

| 0.0 | 1.0 | 2.0 | 3.0 | 4.0 | 5.0 | 6.0 | 7.0 | years |
|-----|-----|-----|-----|-----|-----|-----|-----|-------|
| 104 | 87  | 70  | 51  | 45  | 38  | 34  | 28  |       |

All patients  
Distant metastasis-free survival

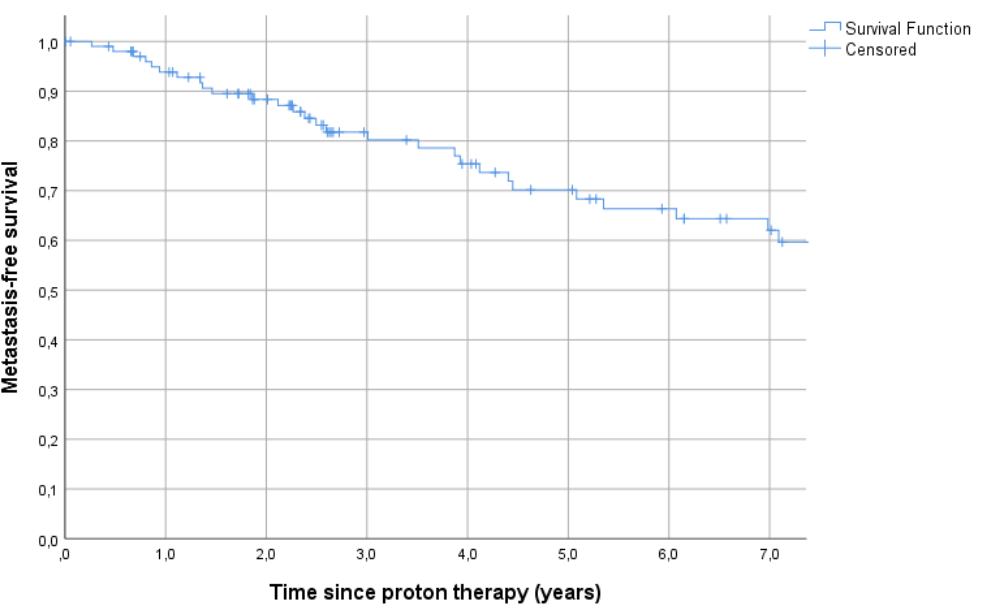

Numbers at risk

| 0.0 | 1.0 | 2.0 | 3.0 | 4.0 | 5.0 | 6.0 | 7.0 | years |
|-----|-----|-----|-----|-----|-----|-----|-----|-------|
| 103 | 90  | 74  | 52  | 46  | 39  | 33  | 27  |       |

Supplementary Figure S2. Ophthalmological outcomes in all patients

All patients  
Enucleation-free survival

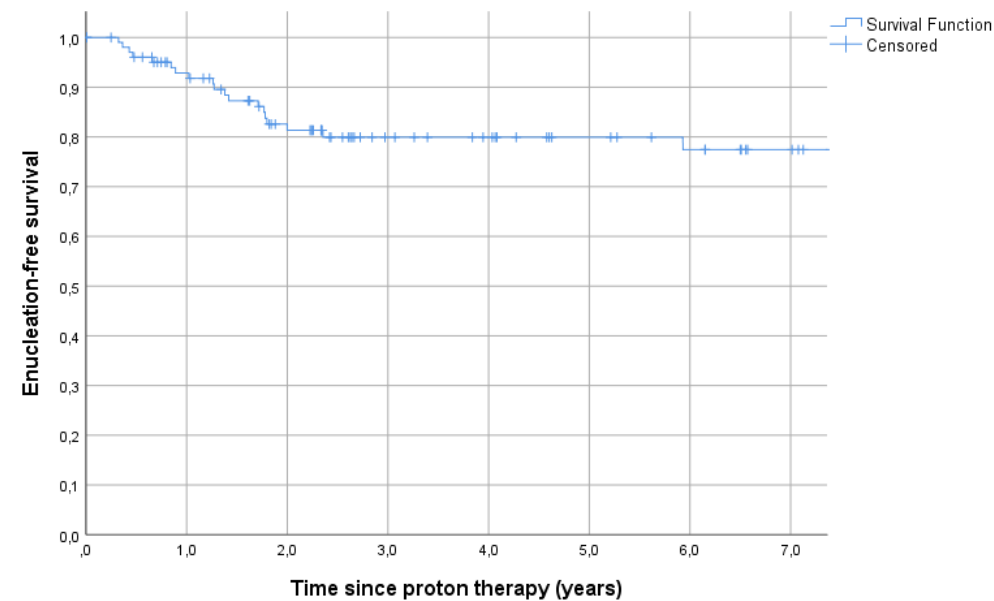

| Numbers at risk |     |     |     |     |     |     |     |       |
|-----------------|-----|-----|-----|-----|-----|-----|-----|-------|
| 0.0             | 1.0 | 2.0 | 3.0 | 4.0 | 5.0 | 6.0 | 7.0 | years |
| 104             | 86  | 66  | 47  | 42  | 35  | 31  | 25  |       |

All patients  
Severe visual impairment-free survival

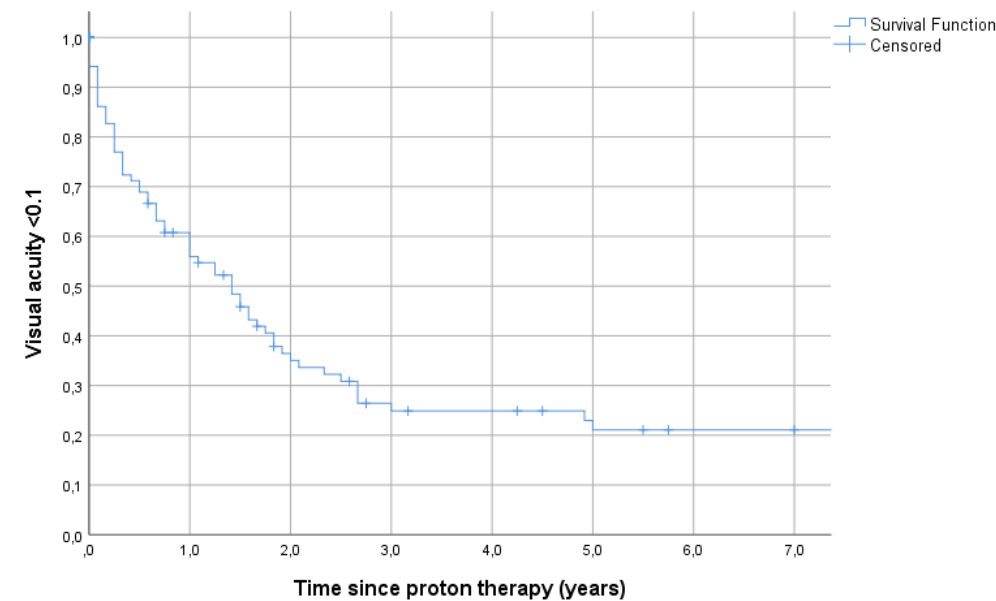

| Numbers at risk |     |     |     |     |     |     |     |       |
|-----------------|-----|-----|-----|-----|-----|-----|-----|-------|
| 0.0             | 1.0 | 2.0 | 3.0 | 4.0 | 5.0 | 6.0 | 7.0 | years |
| 104             | 51  | 27  | 18  | 16  | 13  | 10  | 10  |       |
